# Supplementary material
Source: HighWire-hosted journal article supplement (http://cmajopen.ca/highwire/filestream/80699/field_highwire_adjunct_files/0/open-2012-0013-1-at.pdf)
Supplement: open-2012-0013-1-at.pdf [file open-2012-0013-1-at.pdf]

**Appendix 1: Codes for cancer and histology (as supplied by the authors), part 1 of 2**

| Cancer        | ICD-O Code(s)                                    | Included Histologies                                                                                                   |
|---------------|--------------------------------------------------|------------------------------------------------------------------------------------------------------------------------|
| Head and neck | C00.* – C06.*,<br>C09.* – C14.*<br>C30.* – C32.* | 8004, 8010, 8011, 8020, 8041, 8042, 8051, 8070–8073, 8082, 8083, 8090, 8200, 8211, 8246, 8260, 8263, 8430              |
| Esophagus     | C15.*                                            | 8000, 8010, 8012, 8020, 8041, 8046, 8070–8072, 8076, 8083, 8123, 8140, 8144, 8145, 8260, 8480, 8481, 8490, 8560        |
| Gastric       | C16.*                                            | 8000, 8010, 8020, 8070, 8071, 8140, 8142, 8144, 8145, 8210, 8211, 8240, 8246, 8255, 8260, 8263, 8480, 8481, 8490, 8560 |
| Colorectal    | C18.0, C18.2 – C18.9<br>C19.9<br>C20.9<br>C21.8  | 8000, 8010, 8020, 8070, 8140, 8144, 8210, 8211, 8221, 8240, 8246, 8260, 8261, 8262, 8263, 8310, 8480, 8481, 8490, 8510 |
| Liver         | C22.0                                            | 8000, 8001, 8010, 8012, 8020, 8033, 8170–8172, 8174, 8175, 8180, 8440                                                  |
| Pancreas      | C25.*                                            | 8000, 8001, 8010, 8012, 8020, 8041, 8046, 8140, 8150, 8240, 8246, 8260, 8440, 8470, 8480, 8481, 8490, 8500, 8550, 8560 |
| Lung          | C33.9<br>C34.*                                   | 8000, 8010, 8012, 8020, 8040, 8042, 8046, 8070–8072, 8140, 8240, 8246, 8250, 8255, 8260, 8480, 8481, 8550, 8560        |
| Melanoma      | C44.*                                            | 8720 – 8790<br>(with or without ICD-10 code C44.*)                                                                     |
| Female breast | C50.* (female)                                   | 8000, 8010, 8050, 8140, 8211, 8480, 8500, 8501, 8503, 8504, 8510, 8520–8524, 8530, 8541, 8543, 8575                    |
| Corpus uteri  | C54.*                                            | 8000, 8010, 8020, 8050, 8070, 8072, 8140, 8210, 8260, 8263, 8310, 8323, 8380, 8441, 8460, 8461, 8480, 8481, 8560, 8570 |
| Cervix        | C53.*                                            | 8010, 8041, 8052, 8070–8072, 8076, 8100, 8140, 8246, 8260, 8263, 8310, 8380, 8384, 8460, 8480, 8481, 8560, 8570        |
| Ovary         | C56.9                                            | 8000, 8010, 8020, 8070, 8140, 8260, 8310, 8323, 8380, 8441, 8442, 8460–8462, 8470, 8472, 8480, 8620, 9060, 9080        |
| Prostate      | C61.9                                            | 8000, 8010, 8041, 8046, 8070, 8130, 8140, 8145, 8201, 8255, 8260, 8310, 8340, 8341, 8380, 8480, 8481, 8490, 8500, 8550 |
| Bladder       | C67.*                                            | 8000, 8001, 8010, 8020, 8033, 8041, 8050, 8070, 8071, 8120, 8122, 8130, 8191, 8140, 8246, 8260, 8310, 8480, 8481, 8490 |
| Renal         | C64.9<br>C65.9                                   | 8000, 8010, 8012, 8050, 8070, 8120, 8130, 8140, 8255, 8260, 8270, 8290, 8310, 8312, 8316–8320, 8323                    |
| Brain         | C71.*                                            | 8000, 8140, 9380, 9382, 9391, 9392, 9400, 9401, 9411, 9420, 9421, 9424, 9430, 9440–9442, 9450, 9451, 9470, 9573        |

**Appendix 1: Codes for cancer and histology (as supplied by the authors), part 2 of 2**

| <b>Cancer</b>      | <b>ICD-O Code(s)</b>                                                                                                                                                                                                                                           | <b>Included Histologies</b>                                                                                                                                                                             |
|--------------------|----------------------------------------------------------------------------------------------------------------------------------------------------------------------------------------------------------------------------------------------------------------|---------------------------------------------------------------------------------------------------------------------------------------------------------------------------------------------------------|
| Lymphoma           | C77.*                                                                                                                                                                                                                                                          | 9650–9667, 9590–9596, 9670, 9671, 9673, 9675, 9678–9680, 9684, 9687, 9689–9691, 9695, 9698–9702, 9705, 9708, 9709, 9714–9719, 9727–9729, 9823, 9827–9829                                                |
| Multiple myeloma   | -                                                                                                                                                                                                                                                              | 9731, 9732, 9734                                                                                                                                                                                        |
| Leukemia           | C42.*                                                                                                                                                                                                                                                          | 9733, 9742, 9800, 9801, 9805, 9820, 9823, 9826, 9827, 9831–9834, 9835–9837, 9840, 9860, 9861, 9863, 9866, 9867, 9870–9876, 9891, 9895, 9897, 9910, 9920, 9930, 9931, 9940, 9945, 9946, 9948, 9963, 9964 |
| Thyroid            | C73.9                                                                                                                                                                                                                                                          | 8000, 8010, 8021, 8050, 8070, 8071, 8140, 8260, 8290, 8330, 8331, 8335, 8337, 8340–8344, 8350, 8510                                                                                                     |
| Testis             | C62.*                                                                                                                                                                                                                                                          | 8000, 8001, 8010, 8140, 8650, 8940, 9061, 9062–9065, 9070, 9071, 9080, 9081, 9083, 9085, 9100, 9101, 9364                                                                                               |
| Other tumour sites | C07.* – C08.*<br>C17.*<br>C18.1<br>C22.1<br>C24.*<br>C26.0, C26.8 – C26.9<br>C37.9<br>C38.* - C41.*<br>C42.2, C42.3<br>C47.* - C49.*<br>C50.* (male)<br>C51.*<br>C52.9<br>C57.*<br>C58.9<br>C60.*<br>C63.*<br>C68.* – C70.*<br>C72.*<br>C74.* – C75.*<br>C80.9 | EXCLUDED:<br>9590 – 9989 Leukemia, lymphoma and multiple myeloma                                                                                                                                        |

Legend: ICD-O – International Classification of Disease-Oncology
